# Supplementary material
Source: publisher figshare collection journal article supplement (https://gsapubs.figshare.com/ndownloader/files/23314949)
Supplement: Supplementary file 1 [file 23314949]

## Sheet: Table
GSA DR Item 2019083 accompanies Knott, J.R., Wan, E., Deino, A.L., Casteel, M., Reheis, M.C., Phillips, F.M., Walkup, L., McCarty, K., Manoukian, D.N., and Nunez, E., Jr., 2019,
Lake Andrei: A Pliocene pluvial lake in Eureka Valley, eastern California, in Starratt, S.W., and Rosen, M.R., eds., From Saline to Freshwater: The Diversity of Western Lakes in Space and
Time: Geological Society of America Special Paper 536, https://doi.org/10.1130/2018.2536(08).
														DATA REPOSITORY TABLE: ANALYTICAL DATA FROM 40Ar/39Ar DATING.
					Relative Isotopic Abundances								Derived Results											Inverse Isochron Data
Lab ID#	Watts	Irrad.	J		40Ar		39Ar		37Ar		36Ar		39Ar Mol	39Ar %	%(36Ar)Ca	Ca/K		40Ar*/39Ar		%40Ar*	Age (Ma)		w/±J	36Ar/40Ar		39Ar/40Ar		36Ar/39Ar
			( X 10-3) ± 1s		±1s		±1s		±1s		±1s		¥ 10-15	of total		±1s		±1s			±1s		±1s	±%1s		±%1s		Er. Corr.
JRK061811-07
26129-01A	1	418A	1.0723	0.0019	6990	180	1063	6	-2	13	17.6	1.4	0.0180724	0.185965	-0.0088139	-0.01	0.09	1.62268	0.434621	24.6768	3.2	0.8	0.851496	0.0025229	8.4724	0.152074	2.66602	0.300896
26129-01B	1.5	418A	1.0723	0.0019	66830	190	22940	30	124	13	94	2	0.390155	4.0132	0.128818	0.039	0.004	1.69579	0.0280224	58.2559	3.32	0.05	0.0552084	0.0013982	2.21595	0.343532	0.30643	0.118893
26129-01C	2	418A	1.0723	0.0019	176100	200	94680	70	192	13	26.7	1.5	1.60999	16.5637	0.689136	0.0144	0.001	1.77569	0.0053852	95.506	3.482	0.01	0.0122098	0.0001505	5.6796	0.537852	0.138769	0.0179555
26129-01D	2.5	418A	1.0723	0.0019	163300	200	89930	60	114	13	10	1.4	1.52922	15.7327	1.06855	0.0088	0.0011	1.78176	0.005434	98.1856	3.493	0.011	0.0123029	6.07e-05	14.495	0.55106	0.143989	0.0077427
26129-01E	3	418A	1.0723	0.0019	137340	200	74100	70	77	13	11.2	1.5	1.25995	12.9633	0.638979	0.0072	0.0013	1.80749	0.0069045	97.5728	3.544	0.014	0.014902	8.13e-05	13.6823	0.539825	0.170555	0.0091828
26129-01F	3.5	418A	1.0723	0.0019	134000	200	74410	50	91	13	0	1.6	1.26526	13.0175	305.946	0.0085	0.0013	1.7995	0.0070121	100.013	3.528	0.014	0.0150823	-4.62022e-07	-2547.12	0.555781	0.168538	5.47e-05
26129-01G	4	418A	1.0723	0.0019	107200	200	59560	50	62	13	-0.7	1.4	1.01281	10.4196	-7.85905	0.0071	0.0016	1.80185	0.008111	100.219	3.533	0.016	0.0170685	-7.37523e-06	-178.896	0.556203	0.219746	0.0010285
26129-01H	5	418A	1.0723	0.0019	93500	200	50180	40	61	13	14.6	1.4	0.853262	8.77867	0.39201	0.0084	0.002	1.77583	0.009631	95.3465	3.482	0.019	0.0198422	0.0001558	9.64392	0.536912	0.25867	0.023648
26129-01I	6	418A	1.0723	0.0019	58700	200	31980	40	20	13	5.1	1.4	0.543814	5.59469	0.343457	0.004	0.003	1.78661	0.0150354	97.4248	3.5	0.03	0.0300939	8.62e-05	28.5484	0.545306	0.364438	0.0115665
26129-01J	12	418A	1.0723	0.0019	126900	200	72770	60	90	13	4.9	1.6	1.23742	12.7306	1.73945	0.0086	0.0013	1.72336	0.0071847	98.873	3.379	0.014	0.0152872	3.77e-05	32.9018	0.573723	0.181044	0.004477
JRK061811-07 #2
26129-02A	1.5	418A	1.0723	0.0019	19900	200	10893	18	7	13	3.6	1.7	0.185221	2.0557	0.183284	0.004	0.009	1.72467	0.0514332	94.647	3.38	0.1	0.10093	0.0001793	49.1673	0.548784	1.02375	0.020276
26129-02B	1.7	418A	1.0723	0.0019	25000	600	12744	17	28	13	-0.2	1.7	0.216711	2.40502	-11.5863	0.016	0.008	1.96534	0.0591546	100.309	3.85	0.12	0.116048	-1.04e-05	-663.205	0.51039	2.21107	0.0033215
26129-02C	1.9	418A	1.0723	0.0019	117800	600	63790	60	82	13	6.2	1.5	1.08471	12.0383	1.2594	0.009	0.0015	1.81729	0.0113091	98.4566	3.56	0.02	0.0230277	5.17e-05	24.8196	0.541777	0.478644	0.018676
26129-02D	2.2	418A	1.0723	0.0019	116000	600	61800	50	62	13	9.7	1.5	1.05084	11.6628	0.591115	0.0069	0.0016	1.82934	0.0115545	97.5106	3.59	0.02	0.0235014	8.33e-05	15.2948	0.533038	0.48469	0.0307739
26129-02E	2.6	418A	1.0723	0.0019	97200	200	52400	50	68	13	9.5	1.4	0.891085	9.88881	0.675354	0.0091	0.0018	1.7993	0.0088987	97.0913	3.528	0.017	0.0185103	9.74e-05	14.3955	0.539606	0.236414	0.0138002
26129-02F	3	418A	1.0723	0.0019	82400	200	42690	40	54	13	22.4	1.3	0.725844	8.05636	0.227214	0.009	0.002	1.77287	0.0106891	91.8932	3.48	0.02	0.0218193	0.0002715	5.97439	0.518329	0.272549	0.0400459
26129-02G	3.4	418A	1.0723	0.0019	39000	200	20970	20	25	13	4.6	1.3	0.356632	3.95741	0.517696	0.008	0.004	1.79323	0.0206214	96.5264	3.52	0.04	0.0408671	0.0001163	27.9245	0.538281	0.541402	0.0183966
26129-02H	3.8	418A	1.0723	0.0019	76200	200	42430	40	55	13	0.7	1.3	0.721436	8.00729	7.51001	0.009	0.002	1.7913	0.0110502	99.7509	3.51	0.02	0.0225161	8.30904e-06	212.31	0.556863	0.318234	0.0013572
26129-02I	4	418A	1.0723	0.0019	85300	200	47360	40	55	13	3.1	1.3	0.805349	8.93767	1.66257	0.008	0.002	1.78032	0.0096701	98.9307	3.491	0.019	0.0199196	3.58e-05	42.4663	0.555692	0.288244	0.0061121
26129-02J	4.5	418A	1.0723	0.0019	148200	200	81260	60	87	13	8.3	1.4	1.38171	15.3352	0.986106	0.0074	0.0012	1.79316	0.0061224	98.3495	3.516	0.012	0.0135043	5.52e-05	17.3815	0.54847	0.175191	0.0085646
26129-02K	5	418A	1.0723	0.0019	98100	200	54150	50	47	13	3.6	1.4	0.920805	10.2191	1.19173	0.0059	0.0018	1.79083	0.0088055	98.9059	3.511	0.017	0.0183287	3.66e-05	37.8788	0.552292	0.255315	0.0060205
26129-02L	7	418A	1.0723	0.0019	53000	200	29790	40	30	13	-4.8	1.3	0.506511	5.6219	-0.58659	0.007	0.003	1.8246	0.0155404	102.708	3.58	0.03	0.0310877	-9.07e-05	-27.5927	0.562907	0.453658	0.0152448
26129-02M	12	418A	1.0723	0.0019	16500	200	9615	18	14	13	-1	1.4	0.163487	1.81452	-1.39114	0.01	0.01	1.74367	0.0502683	101.779	3.42	0.1	0.0986542	-5.96e-05	-144.968	0.583704	1.39681	0.0094661
JRK061811-07 #3
26129-03A	1.5	418A	1.0723	0.0019	22960	180	10664	20	15	13	9.7	1.2	0.181315	2.62694	0.149755	0.01	0.009	1.88168	0.0388137	87.4269	3.69	0.08	0.0762986	0.0004211	12.8631	0.464622	0.809164	0.0596175
26129-03B	1.7	418A	1.0723	0.0019	36960	180	18950	30	35	13	8.5	1.3	0.322223	4.6681	0.404405	0.013	0.005	1.81536	0.0228438	93.1499	3.56	0.04	0.045184	0.0002294	15.3964	0.513121	0.515359	0.0310625
26129-03C	1.9	418A	1.0723	0.0019	141790	200	74320	60	91	13	30.5	1.4	1.26365	18.3078	0.291437	0.0088	0.0013	1.78463	0.0063817	93.6009	3.499	0.012	0.0139444	0.0002143	4.61734	0.524484	0.159964	0.0265648
26129-03D	2.2	418A	1.0723	0.0019	105390	190	56630	40	60	13	13	1.4	0.962848	13.9501	0.448851	0.0076	0.0017	1.79153	0.0080413	96.3252	3.512	0.016	0.0169287	0.0001231	10.5021	0.537668	0.196153	0.0161397
26129-03E	2.6	418A	1.0723	0.0019	48080	190	26790	30	53	13	0.8	1.2	0.455504	6.59938	6.91875	0.014	0.004	1.78562	0.0157836	99.5603	3.5	0.03	0.031529	1.47e-05	178.236	0.557566	0.403846	0.0021062
26129-03F	3	418A	1.0723	0.0019	21500	200	12520	20	31	13	-2.8	1.2	0.212841	3.08415	-1.09823	0.018	0.008	1.78278	0.0345571	104.017	3.5	0.07	0.067971	-0.0001346	-43.0002	0.583455	1.03863	0.0234089
26129-03G	3.5	418A	1.0723	0.0019	101900	200	56860	50	68	13	0.8	1.3	0.966815	14.0068	7.94912	0.0086	0.0017	1.78725	0.0079685	99.7767	3.504	0.016	0.0167906	7.44657e-06	169.368	0.558271	0.236885	0.0012284
26129-03H	4	418A	1.0723	0.0019	36200	200	19840	20	36	13	2	1.1	0.337397	4.88734	1.79664	0.013	0.005	1.79564	0.0202914	98.3809	3.52	0.04	0.0402294	5.42e-05	57.1204	0.547888	0.618248	0.0103969
26129-03I	4.5	418A	1.0723	0.0019	8670	180	4724	11	23	13	-0.4	1.2	0.0803201	1.1637	-6.09343	0.04	0.02	1.86026	0.0874019	101.387	3.65	0.17	0.171309	-4.65e-05	-307.615	0.545013	2.11481	0.0067852
26129-03J	5	418A	1.0723	0.0019	16890	180	9329	18	21	13	-0.7	1.3	0.158624	2.29808	-2.94738	0.017	0.01	1.8326	0.0468713	101.295	3.59	0.09	0.0920252	-4.34e-05	-181.073	0.55274	1.09773	0.0058813
26129-03K	7	418A	1.0723	0.0019	107750	190	59070	40	72	13	8.6	1.2	1.00432	14.5512	0.822548	0.0089	0.0017	1.77979	0.0069941	97.6307	3.49	0.014	0.0150223	7.93e-05	13.9971	0.548552	0.193788	0.0119019
26129-03L	12	418A	1.0723	0.0019	100800	200	56250	60	65	13	4	1.2	0.956337	13.8565	1.58572	0.0084	0.0018	1.76987	0.0075612	98.8268	3.47	0.015	0.0160289	3.93e-05	30.2799	0.558384	0.229235	0.0057793
JRK061811-07 #4
26129-04A	1.5	418A	1.0723	0.0019	16950	190	9518	20	10	13	1.3	1.1	0.161823	5.66187	0.731609	0.007	0.01	1.73917	0.0412621	97.7086	3.41	0.08	0.0810517	7.67e-05	87.7951	0.561811	1.1544	0.0127295
26129-04B	1.7	418A	1.0723	0.0019	30760	190	17170	30	25	13	1.5	1.3	0.291886	10.2137	1.6149	0.011	0.006	1.76484	0.0254793	98.5414	3.46	0.05	0.0502823	4.88e-05	86.8981	0.558359	0.648439	0.0069859
26129-04C	1.9	418A	1.0723	0.0019	27480	180	15250	20	22	13	-1.6	1.3	0.259324	9.0716	-1.36229	0.01	0.006	1.83177	0.02861	101.724	3.59	0.06	0.0563959	-5.78e-05	-82.8148	0.555331	0.694549	0.0079373
26129-04D	2.2	418A	1.0723	0.0019	27080	180	15040	20	19	13	-0.9	1.3	0.25575	8.94668	-2.07177	0.009	0.007	1.81726	0.029232	101.023	3.56	0.06	0.057602	-3.43e-05	-143.26	0.555912	0.697745	0.0046085
26129-04E	2.6	418A	1.0723	0.0019	22770	180	12600	20	22	13	-0.7	1.2	0.214188	7.49523	-3.19556	0.013	0.008	1.82329	0.0322059	100.947	3.57	0.06	0.0633971	-3.17e-05	-166.633	0.553654	0.827055	0.0047457
26129-04F	3	418A	1.0723	0.0019	25560	190	14100	20	20	13	0.6	1.2	0.239716	8.38752	3.34847	0.01	0.007	1.79974	0.0292342	99.3222	3.53	0.06	0.0576008	2.27e-05	211.078	0.55187	0.750015	0.0033861
26129-04G	3.5	418A	1.0723	0.0019	103180	190	57060	60	76	13	2.2	1.2	0.970199	33.9427	3.40975	0.0097	0.0017	1.79599	0.0074232	99.3874	3.521	0.014	0.0158144	2.05e-05	57.4578	0.553386	0.213005	0.00287
26129-04H	4	418A	1.0723	0.0019	18940	190	10273	18	13	13	-1.6	1.4	0.174671	6.11099	-0.804437	0.01	0.01	1.89109	0.044524	102.613	3.71	0.09	0.0874486	-8.76e-05	-84.1425	0.542614	0.998982	0.0114958
26129-04I	4.5	418A	1.0723	0.0019	58960	190	10825	17	13	13	137.1	1.8	0.184054	6.43935	0.0095838	0.009	0.009	1.6656	0.0527914	30.5958	3.26	0.1	0.103581	0.0023246	1.35595	0.183693	0.355995	0.209708
26129-04J	5	418A	1.0723	0.0019	3640	180	2030	7	-17	13	0.6	1.2	0.0345157	1.20756	-3.07621	-0.06	0.05	1.70625	0.200934	95.0774	3.3	0.4	0.393665	0.0001648	203.555	0.557231	5.00721	0.0244789
26129-04K	7	418A	1.0723	0.0019	3530	180	1626	7	7	13	-0.7	1.4	0.0276486	0.967241	-0.97958	0.03	0.06	2.30374	0.27598	106.22	4.5	0.5	0.540345	-0.0002084	-186.859	0.461076	5.1846	0.0275281
26129-04L	12	418A	1.0723	0.0019	4630	190	2615	8	32	13	0.8	1.2	0.0444588	1.55556	4.08441	0.09	0.04	1.683	0.153742	95.0297	3.3	0.3	0.301237	0.0001664	154.686	0.564643	4.03988	0.0259535
JRK061811-02
26131-01A	1.5	418A	1.0764	0.002	31090	200	14730	20	30	13	10.2	1.2	0.250514	4.9778	0.292166	0.015	0.006	1.90294	0.0277428	90.219	3.74	0.05	0.0549701	0.0003276	11.6918	0.474103	0.657155	0.0523324
26131-01B	1.7	418A	1.0764	0.002	81100	200	44140	40	53	13	3.9	1.4	0.750587	14.9165	1.28763	0.008	0.002	1.80895	0.0107969	98.571	3.56	0.02	0.0222077	4.78e-05	36.8106	0.544908	0.264597	0.0064042
26131-01C	1.9	418A	1.0764	0.002	105400	300	59520	50	73	13	2	1.5	1.01196	20.114	3.48025	0.0086	0.0016	1.76081	0.0092454	99.4535	3.465	0.018	0.0192557	1.83e-05	78.7562	0.564816	0.296915	0.0034628
26131-01D	2.2	418A	1.0764	0.002	61200	300	34690	40	46	13	3.5	1.3	0.589796	11.723	1.28801	0.01	0.003	1.73374	0.0139116	98.3266	3.41	0.03	0.0280596	5.6e-05	36.8867	0.567135	0.492264	0.0127772
26131-01E	2.6	418A	1.0764	0.002	48200	300	27540	30	42	13	1.7	1.3	0.468214	9.30676	2.37318	0.011	0.004	1.72945	0.0174647	98.9525	3.4	0.03	0.0349024	3.51e-05	74.6845	0.572161	0.622832	0.0080781
26131-01F	3	418A	1.0764	0.002	76800	200	42750	40	47	13	0.5	1.2	0.72697	14.4468	9.05429	0.008	0.002	1.79127	0.0097436	99.8253	3.525	0.019	0.0202173	5.81745e-06	268.691	0.557287	0.277599	0.0009244
26131-01G	3.5	418A	1.0764	0.002	63600	200	35100	30	66	13	1.7	1.2	0.596904	11.8616	3.70901	0.014	0.003	1.7954	0.0121339	99.2147	3.53	0.02	0.02472	2.63e-05	74.5395	0.552604	0.32856	0.0040725
26131-01H	4	418A	1.0764	0.002	32400	200	17500	30	33	13	3	1.3	0.297512	5.91388	1.06904	0.013	0.006	1.80001	0.0245416	97.2772	3.54	0.05	0.0486868	9.12e-05	42.9482	0.540424	0.627664	0.013783
26131-01I	4.5	418A	1.0764	0.002	21100	200	11580	20	14	13	-1	1.3	0.196949	3.9133	-1.35621	0.009	0.008	1.84924	0.0378604	101.442	3.64	0.07	0.0747329	-4.83e-05	-125.747	0.548561	1.01041	0.0077814
26131-01J	5	418A	1.0764	0.002	15200	200	8364	17	7	13	0.8	1.3	0.142212	2.8265	0.748794	0.006	0.012	1.78629	0.0522817	98.3264	3.52	0.1	0.102996	5.6e-05	150.73	0.550451	1.38836	0.0090224
JRK061811-02 #2
26131-02A	1.5	418A	1.0764	0.002	14030	190	7680	18	-3	13	0.2	1.2	0.130572	1.44047	-1.56239	-0.003	0.013	1.81797	0.0511692	99.5603	3.58	0.1	0.100817	1.47e-05	559.46	0.547644	1.35249	0.0023461
26131-02B	1.7	418A	1.0764	0.002	29990	190	15910	30	24	13	4.7	1.3	0.27045	2.98409	0.521831	0.011	0.006	1.79673	0.0273009	95.3665	3.54	0.05	0.0540672	0.0001552	27.9263	0.530777	0.655404	0.0219041
26131-02C	1.9	418A	1.0764	0.002	73390	190	41040	40	53	13	-0.6	1.3	0.697788	7.6975	-9.41029	0.009	0.002	1.79152	0.0107939	100.248	3.52	0.02	0.0221841	-8.33973e-06	-214.904	0.559569	0.28002	0.0011537
26131-02D	2.2	418A	1.0764	0.002	141500	200	79340	70	89	13	1.4	1.2	1.34905	14.8811	6.01322	0.0081	0.0012	1.77706	0.0053086	99.712	3.497	0.01	0.0122481	9.6143e-06	85.6465	0.561105	0.168231	0.0014787
26131-02E	2.6	418A	1.0764	0.002	44350	190	24680	30	21	13	2.6	1.3	0.419655	4.629	0.786553	0.006	0.004	1.76481	0.0172759	98.2768	3.47	0.03	0.0345593	5.77e-05	49.4796	0.556869	0.447005	0.008503
26131-02F	3	418A	1.0764	0.002	109090	190	60910	60	77	13	0.2	1.4	1.03558	11.4243	35.428	0.0092	0.0016	1.7893	0.0075588	99.962	3.521	0.015	0.0162022	1.23945e-06	1006.04	0.558666	0.199265	0.0001561
26131-02G	3.5	418A	1.0764	0.002	88860	190	49240	50	69	13	1.4	1.2	0.837197	9.2355	4.89688	0.01	0.002	1.79548	0.0082199	99.555	3.534	0.016	0.0174104	1.49e-05	87.3157	0.554477	0.239842	0.0022281
26131-02H	4	418A	1.0764	0.002	59390	190	32610	40	43	13	2	1.3	0.554399	6.11636	2.12785	0.01	0.003	1.80231	0.0132231	99.0205	3.55	0.02	0.0267984	3.28e-05	65.6952	0.549408	0.33874	0.004563
26131-02I	4.5	418A	1.0764	0.002	158200	200	27010	40	42	12	367	2	0.459224	5.06602	0.0112869	0.011	0.004	1.79979	0.0293517	30.7503	3.54	0.06	0.0580733	0.0023194	0.709083	0.170855	0.189117	0.127135
26131-02J	5	418A	1.0764	0.002	57420	190	30520	30	34	12	8.7	1.3	0.518885	5.72436	0.384452	0.008	0.003	1.79554	0.0143167	95.4969	3.53	0.03	0.028884	0.0001508	15.0548	0.531856	0.348693	0.0210188
26131-02K	7	418A	1.0764	0.002	158800	200	87950	80	113	12	7.2	1.1	1.49532	16.496	1.55368	0.0094	0.0011	1.78054	0.0047501	98.6695	3.504	0.009	0.011334	4.45e-05	15.965	0.554155	0.1562	0.0070648
26131-02L	12	418A	1.0764	0.002	138430	200	76270	70	103	12	8.3	1.3	1.29676	14.3053	1.23215	0.0099	0.0012	1.78178	0.0059251	98.2305	3.507	0.012	0.0133044	5.92e-05	15.8748	0.551306	0.16774	0.0077646
JRK061811-02 #3
26131-03A	1.5	418A	1.0764	0.002	7570	180	4088	12	9	12	1.2	1.2	0.0695137	0.951654	0.806655	0.02	0.02	1.7645	0.101096	95.3506	3.47	0.2	0.198879	0.0001557	104.965	0.540384	2.46168	0.0230886
26131-03B	1.7	418A	1.0764	0.002	19850	180	10959	19	36	12	1.9	1.3	0.186321	2.55117	1.95682	0.025	0.009	1.75953	0.0404377	97.2164	3.46	0.08	0.0797624	9.32e-05	72.6395	0.552513	0.953158	0.0126702
26131-03C	1.9	418A	1.0764	0.002	20580	180	11241	19	29	12	5.6	1.4	0.191124	2.61682	0.524359	0.019	0.008	1.68172	0.0398765	91.8929	3.31	0.08	0.0786469	0.0002715	24.4859	0.54642	0.904331	0.0356033
26131-03D	2.2	418A	1.0764	0.002	34420	180	18980	30	33	12	4	1.3	0.322683	4.41839	0.84156	0.013	0.005	1.75055	0.0228196	96.5822	3.44	0.04	0.0453109	0.0001144	33.1205	0.551724	0.553279	0.0155868
26131-03E	2.6	418A	1.0764	0.002	83860	190	46550	50	74	12	3	1.4	0.791462	10.8365	2.48047	0.012	0.002	1.78173	0.0098065	98.9701	3.506	0.019	0.0203238	3.45e-05	47.0255	0.555471	0.250656	0.0043653
26131-03F	3	418A	1.0764	0.002	36100	180	20080	30	34	12	2.4	1.2	0.341468	4.67446	1.42842	0.012	0.005	1.76146	0.0206566	98.0657	3.47	0.04	0.0411092	6.48e-05	53.1448	0.55673	0.517301	0.0090738
26131-03G	3.5	418A	1.0764	0.002	46300	180	26240	30	50	13	1.7	1.3	0.446098	6.10846	2.88813	0.014	0.004	1.74423	0.0162199	98.9145	3.43	0.03	0.032507	3.63e-05	76.0829	0.567096	0.406921	0.0049321
26131-03H	4	418A	1.0764	0.002	82180	180	46290	50	69	12	0	1.4	0.787035	10.7759	-876.882	0.011	0.002	1.77466	0.0099076	100.028	3.493	0.019	0.0205046	-9.74125e-07	-1724.04	0.563646	0.245775	0.0001194
26131-03I	4.5	418A	1.0764	0.002	95720	180	54140	50	78	13	1.3	1.3	0.920428	12.6034	6.06952	0.0106	0.0018	1.7603	0.0081187	99.6237	3.464	0.016	0.0171791	1.26e-05	108.961	0.565948	0.209582	0.0015567
26131-03J	5	418A	1.0764	0.002	114420	180	64400	50	62	12	0.5	1.2	1.09492	14.9918	12.3282	0.007	0.0015	1.77361	0.0063768	99.8874	3.49	0.012	0.0140752	3.73714e-06	280.726	0.563186	0.175643	0.0005221
26131-03K	7	418A	1.0764	0.002	139700	180	80340	60	98	12	1.2	1.3	1.36601	18.7025	7.94728	0.0089	0.0012	1.73351	0.00544	99.7597	3.412	0.011	0.0123896	8.01317e-06	114.324	0.575477	0.152296	0.0010551
26131-03L	12	418A	1.0764	0.002	68580	180	46260	40	83	12	-1.3	1.4	0.786489	10.769	-6.44218	0.013	0.002	1.49035	0.0097326	100.599	2.934	0.019	0.0198827	-2.01e-05	-99.2057	0.675	0.27847	0.0024952
JRK061811-02 #4
26131-04A	1.5	418A	1.0764	0.002	21920	170	12130	20	10	12	0	1.2	0.206313	9.86845	-31.8949	0.006	0.008	1.80651	0.0329207	100.054	3.56	0.06	0.0650532	-1.84623e-06	-2968.88	0.553854	0.803966	0.000257
26131-04B	1.7	418A	1.0764	0.002	22900	170	12700	20	18	12	0.8	1.2	0.216022	10.3322	2.17662	0.01	0.008	1.78255	0.0308709	98.9415	3.51	0.06	0.061037	3.54e-05	144.995	0.555057	0.765279	0.0050505
26131-04C	1.9	418A	1.0764	0.002	16520	170	9261	18	3	12	0.1	1.2	0.15745	7.53435	1.57173	0.002	0.01	1.77828	0.043927	99.7383	3.5	0.09	0.0866064	8.73047e-06	856.27	0.560868	1.04337	0.0011766
26131-04D	2.2	418A	1.0764	0.002	13260	170	7292	16	21	12	-1.8	1.1	0.123978	5.93246	-1.20827	0.022	0.013	1.8907	0.0519356	104.019	3.72	0.1	0.10233	-0.0001347	-63.3648	0.550162	1.29361	0.0198458
26131-04E	2.6	418A	1.0764	0.002	34320	170	18960	30	22	12	-0.5	1.2	0.322431	15.425	-4.21242	0.008	0.005	1.81701	0.0214633	100.458	3.58	0.04	0.0427048	-1.54e-05	-232.613	0.552877	0.516728	0.0020522
26131-04F	3	418A	1.0764	0.002	84290	190	47140	40	42	12	-0.8	1.2	0.801538	38.3511	-4.87694	0.006	0.002	1.79249	0.0086767	100.315	3.528	0.017	0.0182434	-1.06e-05	-132.315	0.559639	0.247534	0.0016069
26131-04G	3.5	418A	1.0764	0.002	4090	180	2299	8	14	12	0.4	1.3	0.0390912	1.87037	3.79597	0.04	0.04	1.73227	0.184048	97.376	3.4	0.4	0.361944	8.79e-05	354.865	0.562128	4.51804	0.012657
26131-04H	4	418A	1.0764	0.002	13800	180	7610	14	1	12	0	1.3	0.129375	6.19117	-22.091	0.001	0.012	1.81197	0.055921	100.01	3.57	0.11	0.110141	-3.75201e-07	-24749.7	0.551944	1.35647	5.38e-05
26131-04I	4.5	418A	1.0764	0.002	3880	180	2091	8	6	12	-2	1.3	0.0355465	1.70115	-0.318082	0.02	0.04	2.14475	0.202133	115.709	4.2	0.4	0.397349	-0.0005262	-62.9993	0.539498	4.63031	0.0729782
26131-04J	5	418A	1.0764	0.002	2360	170	1132	6	10	12	-1.2	1.3	0.0192432	0.920947	-0.830559	0.06	0.08	2.40493	0.377027	115.378	4.7	0.7	0.740857	-0.0005151	-107.536	0.479757	7.40838	0.0685573
26131-04K	7	418A	1.0764	0.002	1410	170	782	5	-1	12	-1.7	1.4	0.0132874	0.636202	0.0670712	-0.01	0.12	2.44101	0.591036	135.08	4.8	1.2	1.16129	-0.001175	-87.2032	0.553379	12.3337	0.140983
26131-04L	12	418A	1.0764	0.002	1060	180	1520	8	-2	12	-2.4	1.4	0.025844	1.23661	0.0825551	-0.01	0.06	1.16603	0.295518	166.556	2.3	0.6	0.58144	-0.0022293	-60.3874	1.4284	17.2522	0.285445
JRK061811-02 #5
26131-05A	1	418A	1.0764	0.002	12400	200	4458	14	-5	10	14.3	1.3	0.0755491	2.1022	-0.113978	-0.03	0.06	1.81225	0.0971358	65.4527	3.57	0.19	0.191092	0.0011571	9.05508	0.361167	1.70663	0.182276
26131-05B	1.5	418A	1.0764	0.002	116900	200	64760	60	16	10	3.8	1	1.09753	30.538	1.32236	0.006	0.004	1.78596	0.0059688	99.0317	3.515	0.012	0.0133869	3.24e-05	26.6271	0.554501	0.208206	0.0062091
26131-05C	2	418A	1.0764	0.002	79500	200	44250	50	-9	10	3.3	1.2	0.749938	20.8663	-0.995275	-0.005	0.006	1.77307	0.0094481	98.7638	3.49	0.018	0.0196465	4.14e-05	35.5972	0.55702	0.289614	0.007046
26131-05D	2.5	418A	1.0764	0.002	124800	200	69340	60	29	10	4.6	1.2	1.17519	32.6977	2.00905	0.01	0.004	1.77882	0.0062162	98.9095	3.501	0.012	0.0138034	3.65e-05	26.5535	0.55604	0.189436	0.0059693
26131-05E	3	418A	1.0764	0.002	20900	200	11430	20	10	10	2.3	1.2	0.193767	5.38988	1.34381	0.02	0.02	1.76407	0.0371225	96.717	3.47	0.07	0.0732675	0.0001099	53.5495	0.548261	1.02813	0.0184946
26131-05F	3.5	418A	1.0764	0.002	20700	200	11246	17	-1	10	1	1.2	0.190593	5.30312	-0.305218	0	0.02	1.81464	0.0365707	98.5425	3.57	0.07	0.0721992	4.88e-05	116.951	0.543041	1.02125	0.0085522
26131-05G	4.5	418A	1.0764	0.002	8600	200	4579	10	4	10	0.7	1.3	0.0775983	2.15925	2.04995	0.02	0.05	1.84142	0.0956124	97.5713	3.62	0.19	0.188096	8.13e-05	183.183	0.52987	2.42789	0.013144
26131-05H	6	418A	1.0764	0.002	3100	200	1391	6	-2	10	-0.3	1.3	0.0235801	0.655934	1.68053	-0.03	0.18	2.28028	0.312994	103.043	4.5	0.6	0.615127	-0.000102	-407.579	0.45189	6.79154	0.0166002
26131-05I	10	418A	1.0764	0.002	2400	200	440	4	-4	10	2.9	1.3	0.00746219	0.207485	-0.452761	-0.2	0.6	3.57492	0.986694	64.7082	7	1.9	1.93633	0.0011821	45.1747	0.181006	8.62329	0.18914
26131-05J	15	418A	1.0764	0.002	2800	200	170	2	0	10	9.2	1.2	0.00288901	0.0801645	0.0095962	0	1.4	0.498377	2.45946	2.99862	1	5	4.84241	0.003249	15.1429	0.0601677	7.53398	0.477237
JRK061811-02 #6
26131-06A	0.8	418A	1.0764	0.002	10	180	5.2	1.9	-8	10	-1.1	1.3	8.88431e-05	0.0239519	2.76307	-40	50	59.1084	82.6294	5226.9	110	150	153.039	-0.171721	-3078.42	0.884291	3076.12	0.999121
26131-06B	1	418A	1.0764	0.002	540	180	215	3	14	10	0.4	1.2	0.00364673	0.990318	12.2438	1.8	1.3	1.99839	1.91796	79.2376	4	4	3.77018	0.0006954	330.044	0.396508	33.7294	0.101985
26131-06C	1.3	418A	1.0764	0.002	7660	180	4036	12	318	10	2.8	1.2	0.0683772	18.5903	41.5228	2.15	0.07	1.77572	0.0968937	93.5687	3.49	0.19	0.190619	0.0002154	70.01	0.526932	2.41498	0.0340045
26131-06D	1.6	418A	1.0764	0.002	2000	180	982	6	62	10	2.2	1.2	0.0166444	4.52322	10.3029	1.7	0.3	1.43407	0.424213	70.2806	2.8	0.8	0.834406	0.0009954	63.5547	0.490079	9.10623	0.142735
26131-06E	2	418A	1.0764	0.002	1880	180	773	5	46	10	1	1.2	0.0131045	3.56054	16.2544	1.6	0.4	2.09374	0.523838	86.0361	4.1	1	1.02964	0.0004677	138.299	0.41092	9.60792	0.0691928
26131-06F	2.5	418A	1.0764	0.002	15190	180	8112	14	610	10	5.9	1.2	0.137434	37.3649	37.9019	2.05	0.03	1.73705	0.0484398	92.7671	3.42	0.1	0.0954517	0.0002422	31.7214	0.53405	1.19973	0.0370414
26131-06G	3	418A	1.0764	0.002	5020	180	2707	10	195	10	0.9	1.3	0.0458667	12.4688	79.888	1.96	0.1	1.83471	0.158945	98.9264	3.6	0.3	0.312566	3.59e-05	725.105	0.539193	3.59898	0.0049154
26131-06H	3.5	418A	1.0764	0.002	3810	180	1975	7	145	10	1	1.2	0.0334681	9.09711	53.0106	2	0.14	1.85678	0.205839	96.2845	3.6	0.4	0.404738	0.0001244	257.833	0.518555	4.71585	0.0181718
26131-06I	5	418A	1.0764	0.002	3750	180	1844	8	140	10	1.2	1.1	0.0312421	8.4937	44.863	2.07	0.15	1.92951	0.205656	94.9481	3.8	0.4	0.404351	0.0001692	176.393	0.492085	4.8065	0.0270503
26131-06J	10	418A	1.0764	0.002	2570	180	1061	6	76	10	1.9	1.2	0.0179699	4.8871	14.852	2	0.2	1.9714	0.384813	81.3654	3.9	0.8	0.756491	0.0006241	76.801	0.41273	7.01891	0.0906909
